# Supplementary material for: Oral appliance therapy for obstructive sleep apnea: a retrospective study in a psychiatric sleep clinic
Source: PubMed Central journal article supplement (PMC10405904; doi:10.20407/fmj.2022-023), 2022-12-27
Supplement: fmj-9-218-s001.pdf [file fmj-9-218-s001.pdf]

Supplementary Table S1. PSG parameters before and after OA use for the entire group

|                       | All (N = 74) |              |
|-----------------------|--------------|--------------|
|                       | Before OA    | After OA     |
| TIB (min)             | 487.2 ± 30.8 | 481.9 ± 23.6 |
| SPT (min)             | 461.6 ± 40.8 | 458.1 ± 37.7 |
| TST (min)             | 399.6 ± 57.6 | 400.9 ± 53.3 |
| SE (%)                | 82.0 ± 10.9  | 83.1 ± 10.0  |
| Wake (%SPT)           | 13.4 ± 10.2  | 12.6 ± 9.3   |
| REM (%TST)            | 16.6 ± 7.6   | 17.2 ± 6.1   |
| N1/S1 (%TST)          | 13.1 ± 10.9  | 12.9 ± 9.7   |
| N2/S2 (%TST)          | 63.7 ± 12.4  | 63.9 ± 11.2  |
| N3/S3+S4 (%TST)       | 6.6 ± 6.9    | 5.9 ± 5.9    |
| Arl (/h)              | 18.6 ± 6.5   | 13.9 ± 8.5   |
| SL (min)              | 22.8 ± 28.5  | 19.6 ± 22.2  |
| REM SL (min)          | 137.6 ± 78.9 | 132.3 ± 86.2 |
| AHI (/h)              | 12.5 ± 5.0   | 6.6 ± 5.8    |
| AI (/h)               | 3.7 ± 3.9    | 1.3 ± 1.9    |
| HI (/h)               | 8.9 ± 4.6    | 5.3 ± 5.0    |
| PLMI(/h) <sup>#</sup> | 5.8 ± 12.2   | 8.2 ± 17.9   |

Values are presented as means ± standard deviations. There were missing data for the PLMI# (n = 18 patients) calculation.

PSG data were based on the Rechtschaffen and Kales (R & K) and 2007 AASM criteria and were treated equally.

PSG, polysomnography; TIB, time in bed; SPT, sleep period time; TST, total sleep time; SE, sleep efficiency; REM, rapid eye movement sleep stage; N1, non-REM stage 1 (AASM); S1, sleep stage 1 (R & K); N2, non-REM stage 2 (AASM); S2, sleep stage 2 (R & K); N3, non-REM stage 3 (AASM); S3, sleep stage 3 (R & K); S4, sleep stage 4 (R & K); SL, sleep latency; Arl, arousal index; HI, hypopnea index; PLMI, periodic limb movement index

Supplementary Table S2. PSG parameters before and after OA use according to OSA severity at diagnosis

|                       | Mild (N = 50) |              | Moderate (N = 24) |              |
|-----------------------|---------------|--------------|-------------------|--------------|
|                       | Before OA     | After OA     | Before OA         | After OA     |
| TIB (min)             | 485.5 ± 29.2  | 481.8 ± 16.3 | 490.7 ± 34.1      | 482.0 ± 34.6 |
| SPT (min)             | 460.7 ± 41.4  | 457.3 ± 36.4 | 463.5 ± 40.4      | 459.5 ± 40.1 |
| TST (min)             | 401.8 ± 62.8  | 402.0 ± 50.9 | 395.1 ± 45.7      | 398.6 ± 59.2 |
| SE (%)                | 82.8 ± 11.7   | 83.4 ± 9.8   | 80.7 ± 9.0        | 82.7 ± 10.4  |
| Wake (%SPT)           | 12.9 ± 10.7   | 12.2 ± 9.5   | 14.9 ± 8.9        | 13.5 ± 9.2   |
| REM (%TST)            | 16.7 ± 8.3    | 17.8 ± 6.5   | 16.4 ± 6.1        | 16.0 ± 5.2   |
| N1/S1 (%TST)          | 12.6 ± 11.7   | 11.4 ± 8.7   | 14.1 ± 9.2        | 16.1 ± 11.0  |
| N2/S2 (%TST)          | 63.6 ± 13.3   | 65.1 ± 11.2  | 64.0 ± 10.6       | 61.6 ± 11.1  |
| N3/S3+S4 (%TST)       | 7.1 ± 7.1     | 5.8 ± 6.2    | 5.4 ± 6.4         | 6.3 ± 5.4    |
| Arl (/h)              | 16.5 ± 5.2    | 12.9 ± 8.4   | 23.0 ± 7.0        | 20.1 ± 21.8  |
| SL (min)              | 21.5 ± 30.8   | 19.3 ± 22.5  | 25.5 ± 23.4       | 20.1 ± 21.8  |
| REM SL (min)          | 133.8 ± 82.3  | 130.6 ± 92.3 | 145.1 ± 72.7      | 136.1 ± 72.9 |
| AHI (/h)              | 9.6 ± 2.5     | 4.9 ± 4.2    | 18.7 ± 2.3        | 10.1 ± 7.1   |
| AI (/h)               | 2.6 ± 2.3     | 0.9 ± 1.2    | 5.8 ± 5.5         | 2.0 ± 7.8    |
| HI (/h)               | 6.9 ± 2.8     | 4.0 ± 4.0    | 12.9 ± 4.9        | 8.0 ± 5.1    |
| PLMI(/h) <sup>#</sup> | 4.8 ± 10.1    | 6.2 ± 12.2   | 7.9 ± 16.1        | 13.0 ± 26.7  |

Values are presented as means ± standard deviations. There were missing data for the PLMI<sup>#</sup> (n = 18 patients) calculation.

PSG data were based on the Rechtschaffen and Kales (R & K) and 2007 AASM criteria and were treated equally.

PSG, polysomnography; TIB, time in bed; SPT, sleep period time; TST, total sleep time; SE, sleep efficiency; REM, rapid eye movement sleep stage; N1, non-REM stage 1 (AASM); S1, sleep stage 1 (R & K); N2, non-REM stage 2 (AASM); S2, sleep stage 2 (R & K); N3, non-REM stage 3 (AASM); S3, sleep stage 3 (R & K); S4, sleep stage 4 (R & K); SL, sleep latency; ArI, arousal index; HI, hypopnea index; PLMI, periodic limb movement index

Supplementary Table S3. PSG parameters before and after OA use according to the presence of psychiatric comorbidity

|                 | With a psychiatric disorder (N = 29) |               | No psychiatric disorder (N = 45) |              |
|-----------------|--------------------------------------|---------------|----------------------------------|--------------|
|                 | Before OA                            | After OA      | Before OA                        | After OA     |
| TIB (min)       | 490.4 ± 23.5                         | 484.7 ± 27.1  | 485.3 ± 34.8                     | 480.1 ± 21.1 |
| SPT (min)       | 456.8 ± 42.9                         | 459.3 ± 43.5  | 464.7 ± 39.6                     | 457.2 ± 33.9 |
| TST (min)       | 385.1 ± 64.1                         | 407.8 ± 56.7  | 409.0 ± 51.6                     | 396.4 ± 51.2 |
| SE (%)          | 78.6 ± 12.6                          | 84.1 ± 10.0   | 84.3 ± 9.1                       | 82.5 ± 10.0  |
| Wake (%SPT)     | 15.7 ± 11.6                          | 11.7 ± 8.8    | 11.9 ± 9.0                       | 13.2 ± 9.8   |
| REM (%TST)      | 13.2 ± 6.9                           | 15.7 ± 7.1    | 18.8 ± 7.3                       | 18.2 ± 5.2   |
| N1/S1 (%TST)    | 15.7 ± 11.6                          | 14.3 ± 11.0   | 11.4 ± 10.3                      | 12.0 ± 8.7   |
| N2/S2 (%TST)    | 67.4 ± 11.6                          | 65.0 ± 13.4   | 61.4 ± 12.4                      | 63.3 ± 9.7   |
| N3/S3+S4 (%TST) | 3.6 ± 5.0                            | 5.1 ± 6.8     | 8.5 ± 7.3                        | 6.5 ± 5.3    |
| Arl (/h)        | 17.5 ± 6.3                           | 13.8 ± 8.8    | 19.3 ± 7.0                       | 14.0 ± 8.5   |
| SL (min)        | 31.5 ± 36.6                          | 22.4 ± 24.4   | 17.1 ± 20.4                      | 22.4 ± 24.4  |
| REM SL (min)    | 158.9 ± 82.3                         | 160.6 ± 101.6 | 124.7 ± 74.8                     | 114.7 ± 70.7 |
| AHI (/h)        | 12.6 ± 5.1                           | 7.3 ± 6.4     | 12.5 ± 4.9                       | 6.1 ± 5.4    |
| AI (/h)         | 3.4 ± 4.3                            | 1.5 ± 2.5     | 3.8 ± 3.7                        | 1.2 ± 1.5    |
| HI (/h)         | 9.2 ± 4.8                            | 5.8 ± 5.5     | 8.7 ± 4.5                        | 5.0 ± 4.7    |
| PLMI(/h)#       | 4.6 ± 9.4                            | 7.6 ± 15.4    | 6.5 ± 13.7                       | 8.6 ± 19.4   |

Values are presented as means ± standard deviations. There were missing data for the PLMI# (n = 18 patients) calculation.

PSG data were based on the Rechtschaffen and Kales (R & K) and 2007 AASM criteria and were treated equally.

PSG, polysomnography; TIB, time in bed; SPT, sleep period time; TST, total sleep time; SE, sleep efficiency; REM, rapid eye movement sleep stage; N1, non-REM stage 1 (AASM); S1, sleep stage 1 (R & K); N2, non-REM stage 2 (AASM); S2, sleep stage 2 (R & K); N3, non-REM stage 3 (AASM); S3, sleep stage 3 (R & K); S4, sleep stage 4 (R & K); SL, sleep latency; ArI, arousal index; HI, hypopnea index; PLMI, periodic limb movement index
