# Supplementary material for: Oral appliance therapy for obstructive sleep apnea: a retrospective study in a psychiatric sleep clinic
Source: PubMed Central journal article supplement (PMC10405904; doi:10.20407/fmj.2022-023), 2022-12-27
Supplement: fmj-9-218-s002.pdf [file fmj-9-218-s002.pdf]

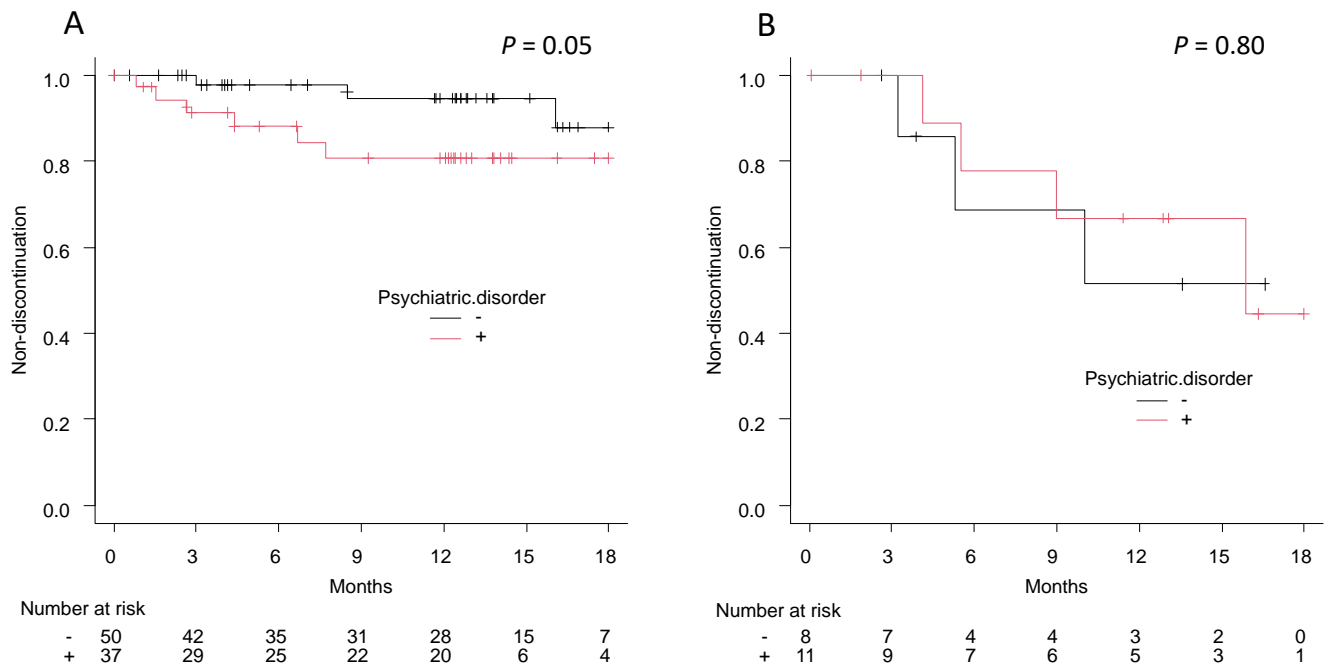

Figure S1. Kaplan–Meier analysis of OA discontinuation in terms of Psychiatric comorbidity [with (red) vs without (black)], stratified by sex.

(A) Males (N=87) (B) Females (N=19)

*P* values were calculated using log-rank test.
